# Supplementary material
Source: PubMed Central journal article supplement (PMC9545391)

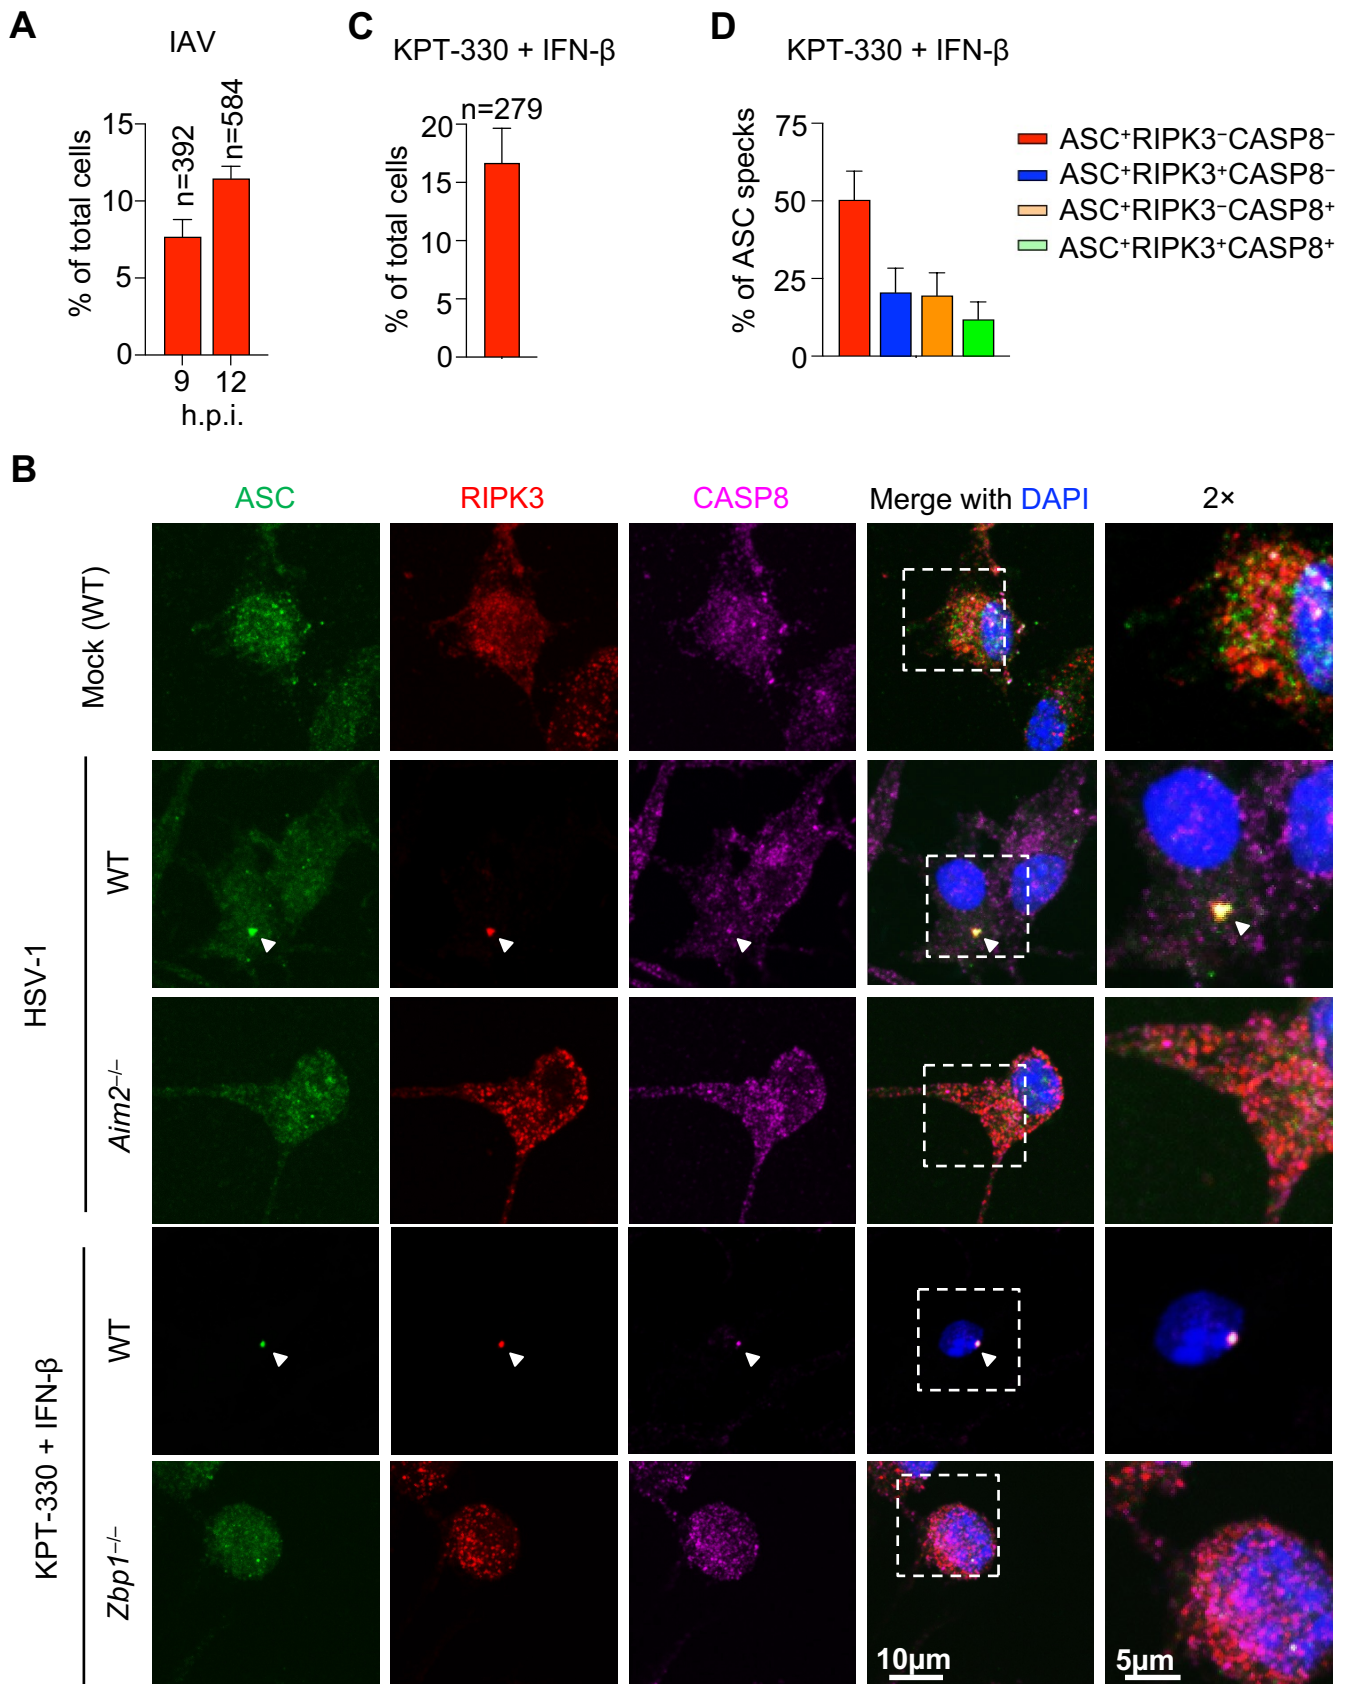

Supplement: NIHMS1839510-supplement-Supp_Figure_1.pdf [file NIHMS1839510-supplement-Supp_Figure_1.pdf]

**A**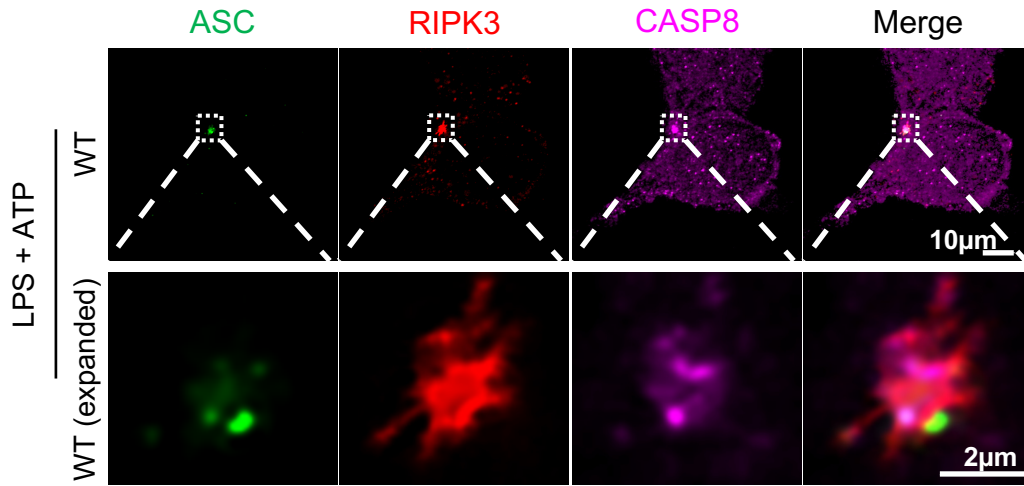**B**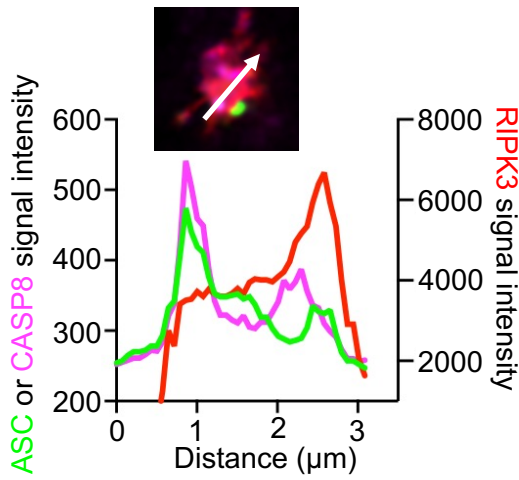**C**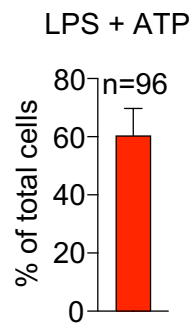**D**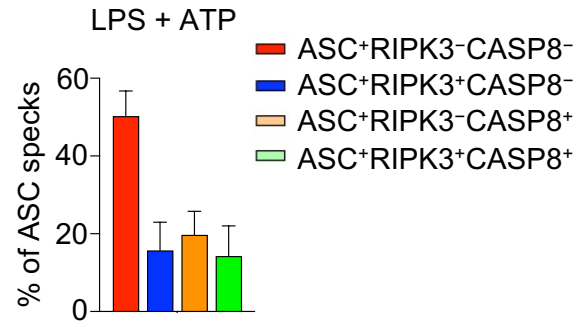**E**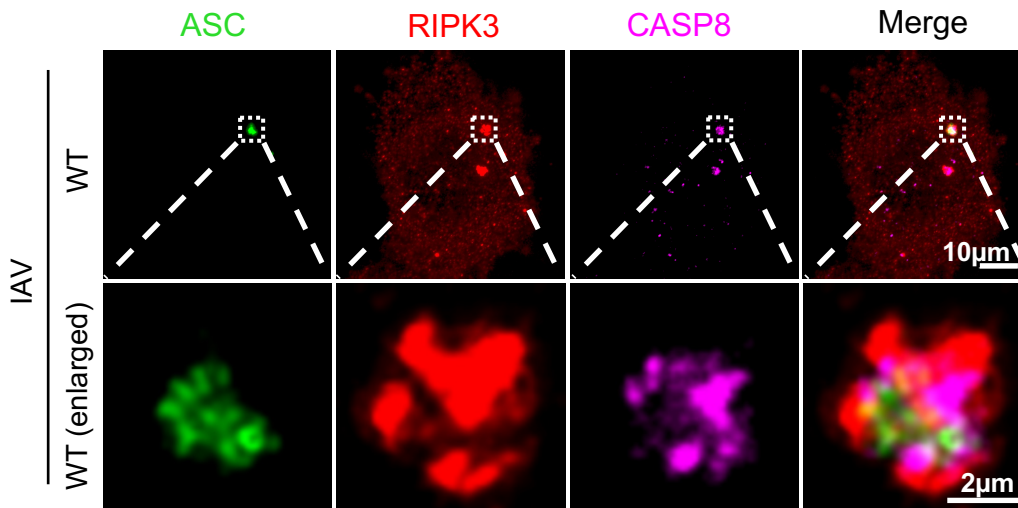

Supplement: NIHMS1839510-supplement-Supp_Figure_2.pdf [file NIHMS1839510-supplement-Supp_Figure_2.pdf]

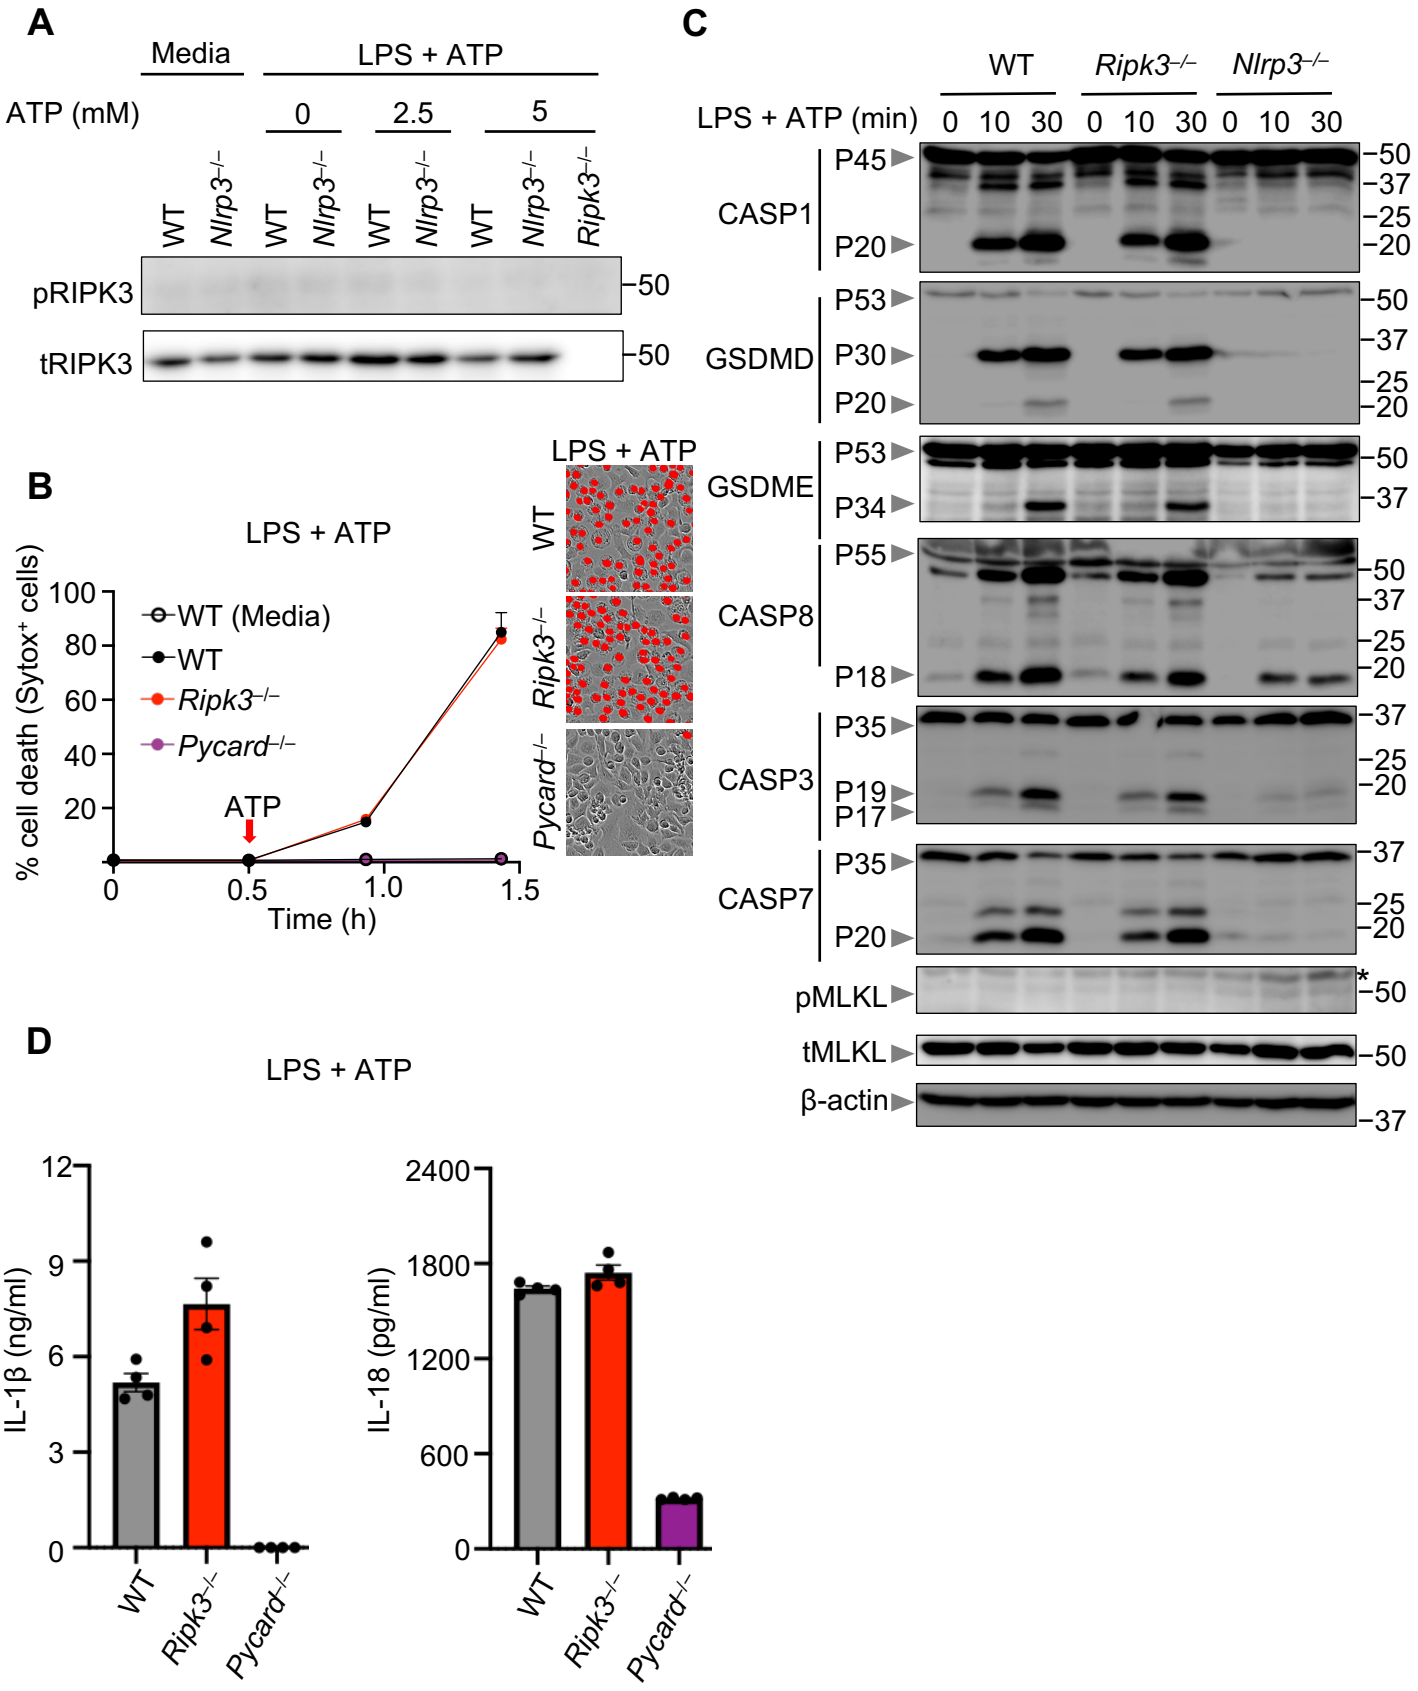

Supplemental Figure 3

Supplement: NIHMS1839510-supplement-Supp_Figure_3.pdf [file NIHMS1839510-supplement-Supp_Figure_3.pdf]
